# Supplementary material for: Intrinsically Microporous Polyimides Derived from 2,2′-Dibromo-4,4′,5,5′-bipohenyltetracarboxylic Dianhydride for Gas Separation Membranes
Source: MDPI journal article supplement (doi:10.3390/polym16091198), 2024-04-25
Supplement: s1 [file s1]

# Intrinsically Microporous Polyimides Derived from 2,2'-Dibromo-4,4',5,5'-biphenyltetracarboxylic Dianhydride for Gas Separation Membranes

Yongle Li <sup>1,2</sup>, Yao Lu <sup>3</sup>, Chun Tian <sup>1,\*</sup>, Zhen Wang <sup>1</sup> and Jingling Yan <sup>1</sup>

<sup>1</sup> Ningbo Institute of Material Technology & Engineering, Chinese Academy of Sciences, Ningbo 315201, China; liyongle@nimte.ac.cn (Y.L.); wz@nimte.ac.cn (Z.W.); jyan@nimte.ac.cn (J.Y.)

<sup>2</sup> College of Chemical Engineering, Zhejiang University of Technology, Hangzhou 310014, China

<sup>3</sup> School of Fine Arts, Zhengzhou University, Zhengzhou 450001, China; luyao94@zzu.edu.cn

\* Correspondence: tianchun@nimte.ac.cn

List of Contents for Supplementary Materials:

**Figure S1.** FT-IR spectra of Br-BPDA-derived PIM-PIs

**Figure S2.** <sup>1</sup>H NMR spectra of Br-BPDA-derived PIM-PIs

**Figure S3.** <sup>13</sup>C NMR spectrum of Br-BPDA-DAT in DMSO-*d*<sub>6</sub>

**Figure S4.** Stress-strain curves of Br-BPDA-derived PIM-PIs

**Figure S5.** Data of water contact angle on the Br-BPDA-derived PIM-PIs surface

**Table S1.** Solubility of Br-BPDA-derived PIM-PIs

**Table S2.** List of abbreviations, acronyms and symbols

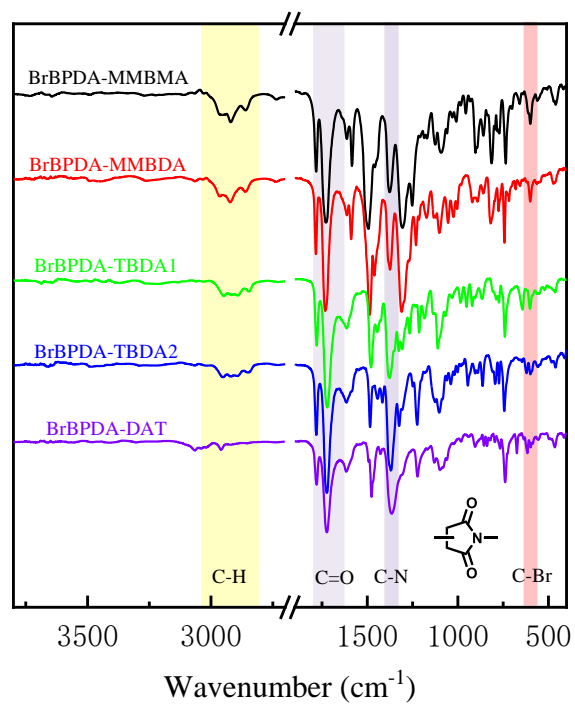

**Figure S1.** FT-IR spectra of Br-BPDA-derived PIM-Pis

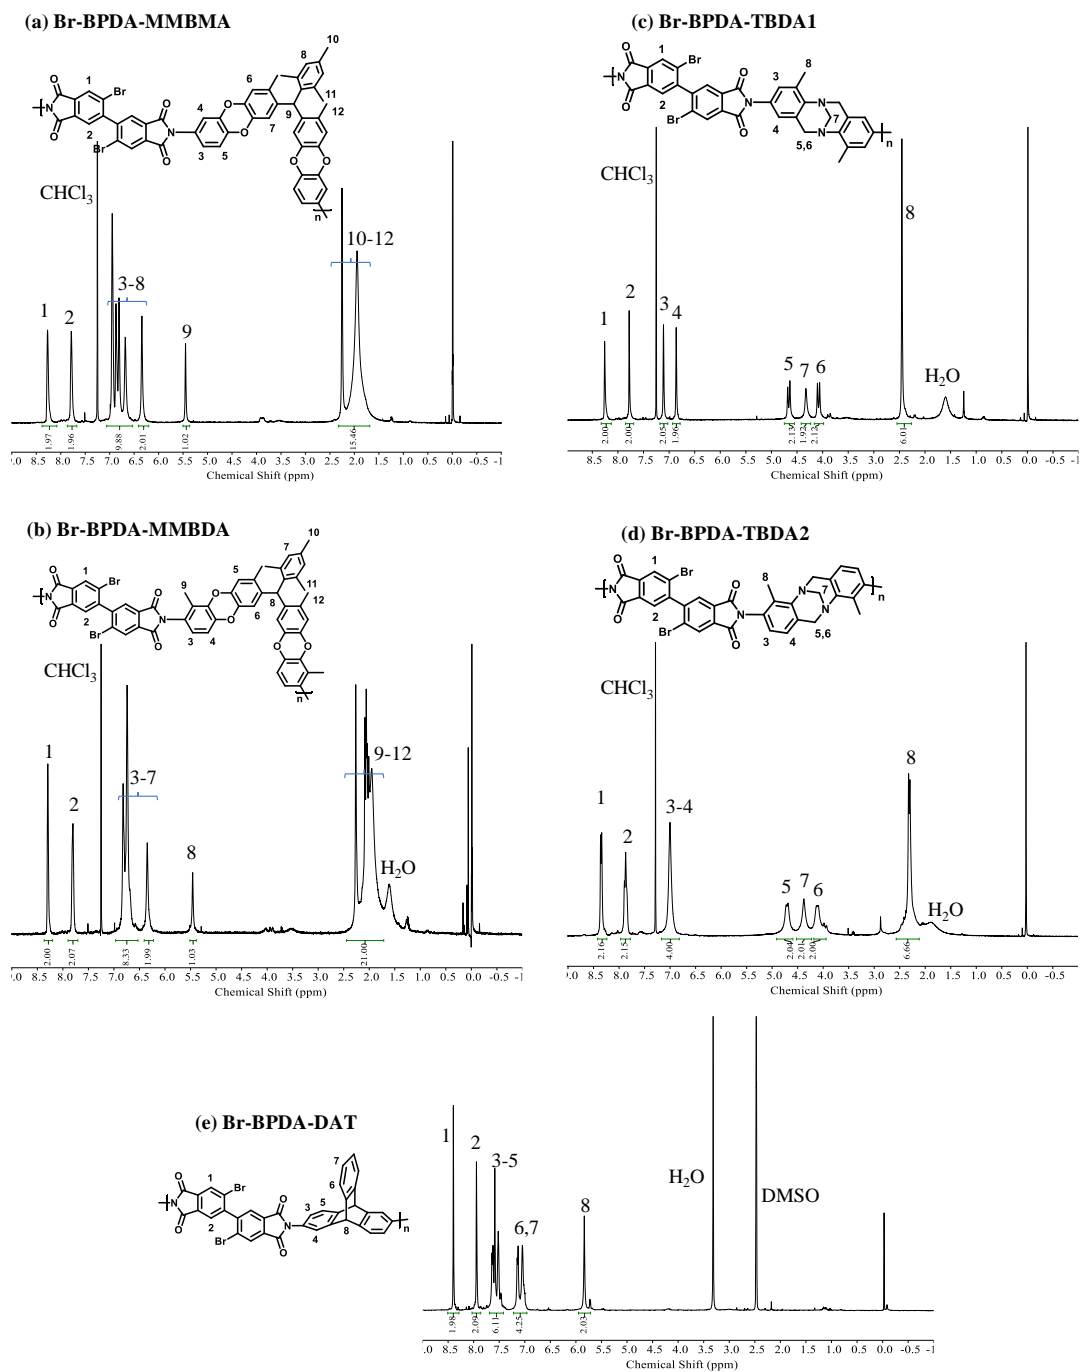

**Figure S2.**  $^1\text{H}$  NMR spectra of Br-BPDA-derived PIM-PIs

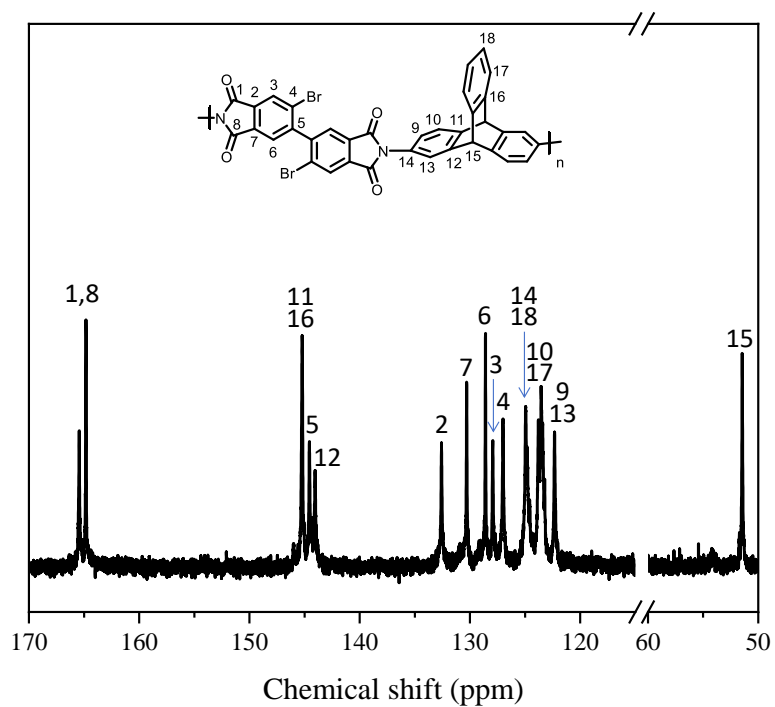

**Figure S3.**  $^{13}\text{C}$  NMR spectrum of Br-BPDA-DAT in  $\text{DMSO}-d_6$

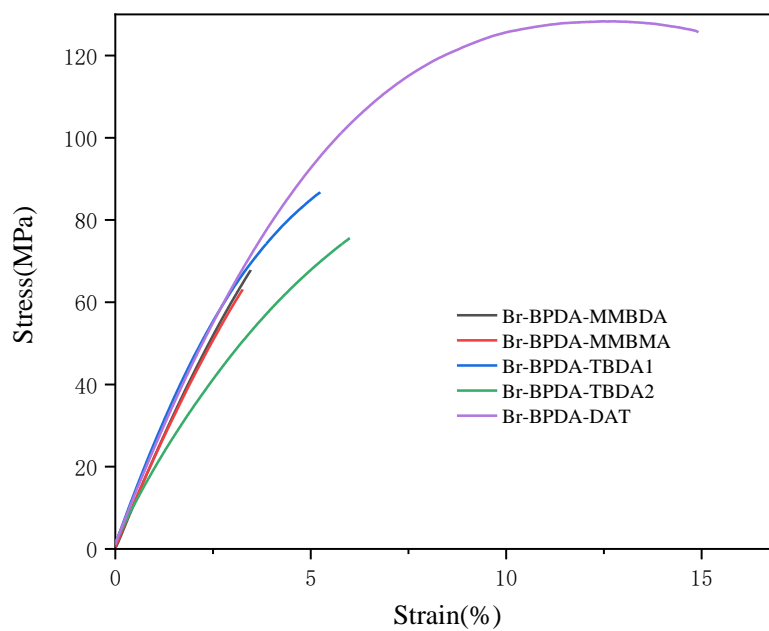

**Figure S4.** Stress-strain curves of Br-BPDA-derived PIM-Pis

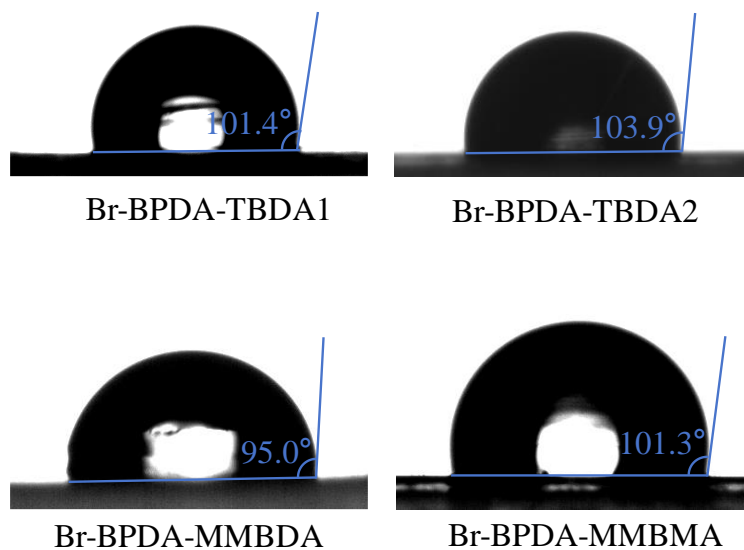

**Figure S5.** Data of water contact angle on the Br-BPDA-derived PIM-PIs surface

**Table S1.** Solubility of Br-BPDA-derived PIM-PI<sup>[a]</sup>

| Polymer       | <i>m</i> -Cresol | NMP | DMAc | DMF | DMSO | THF | CH <sub>2</sub> Cl <sub>2</sub> | CHCl <sub>3</sub> |
|---------------|------------------|-----|------|-----|------|-----|---------------------------------|-------------------|
| Br-BPDA-MMBMA | ++               | +-  | ++   | ++  | +-   | ++  | ++                              | ++                |
| Br-BPDA-MMBDA | ++               | +-  | ++   | ++  | +-   | ++  | ++                              | ++                |
| Br-BPDA-TBDA1 | ++               | ++  | ++   | ++  | ++   | --  | +-                              | ++                |
| Br-BPDA-TBDA2 | ++               | ++  | ++   | ++  | ++   | --  | +-                              | ++                |
| Br-BPDA-DAT   | ++               | ++  | ++   | ++  | ++   | --  | --                              | +-                |

[a] Determined at a concentration of 0.1g dL<sup>-1</sup>. ++, Soluble at room temperature. +-, soluble upon heating. --, insoluble at room temperature.

**Table S2.** List of abbreviations, acronyms and symbols

| Acronyms  | Full name                                                                |
|-----------|--------------------------------------------------------------------------|
| 4,4'-BPDA | 3,3',4,4'-biphenyltetracarboxylic dianhydride                            |
| 6FDA      | 4,4'-(Hexafluoroisopropylidene)diphthalic anhydride                      |
| Br-BPDA   | 2,2'-dibromo-4,4',5,5'-biphenyltetracarboxylic dianhydride               |
| $D$       | Pore width                                                               |
| $d_A$     | Peak A of $d$ -spacing                                                   |
| DAT       | (9R,10R)-9,10-dihydro-9,10-[1,2]benzenoanthracene-2,6-diamine            |
| $d_B$     | Peak B of $d$ -spacing                                                   |
| DMA       | Dynamic thermomechanical analysis                                        |
| DMF       | <i>N,N</i> -Dimethylformamide                                            |
| $FFV$     | Fractional free volume                                                   |
| FT-IR     | Fourier transform infrared                                               |
| GPC       | Gel permeation chromatography                                            |
| MMBDA     | 7,7'-(Mesitylmethylene)bis(1,8-dimethyldibenzo[b,e][1,4] dioxin-2-amine) |
| MMBMA     | 7,7'-(mesitylmethylene)bis(8-methyldibenzo[b,e][1,4]dioxin-2-amine)      |
| $M_n$     | Number average molecular weights                                         |
| $M_w$     | Weight average molecular weights                                         |
| NMP       | <i>N</i> -Methylpyrrolidone                                              |
| ODA       | 4,4'-oxydianiline                                                        |
| PDI       | Polydispersity indices                                                   |
| PI        | Polyimide                                                                |
| PIM       | Polymers of intrinsic                                                    |
| PIM-PI    | Intrinsically microporous polyimides                                     |
| PTFE      | Polytetrafluoroethylene                                                  |
| SBET      | BET surface area                                                         |
| SBI       | Spirobisindane                                                           |
| TB        | Tröger's base                                                            |

|          |                                                                         |
|----------|-------------------------------------------------------------------------|
| TBDA1    | 4,10-dimethyl-6H,12H-5,11-methanodibenzo[b,f][1,5]diazocine-2,8-diamine |
| TBDA2    | 4,10-dimethyl-6H,12H-5,11-methanodibenzo[b,f][1,5]diazocine-3,9-diamine |
| $T_{d5}$ | 5% thermal decomposition temperature                                    |
| $T_g$    | Glass transition temperature                                            |
| TGA      | Thermogravimetric analysis                                              |
| Trip     | Triptycene                                                              |
| $V_M$    | Cumulative volume of micropores                                         |
| $V_w$    | Van der Waals volume                                                    |
| WAXD     | Wide-angle x-ray diffraction                                            |

---
